# Supplementary material
Source: HighWire-hosted journal article supplement (https://bmjopen.bmj.com/content/15/1/e085026)
Supplement: inline-supplementary-material-1 [file inline-supplementary-material-1.pdf]

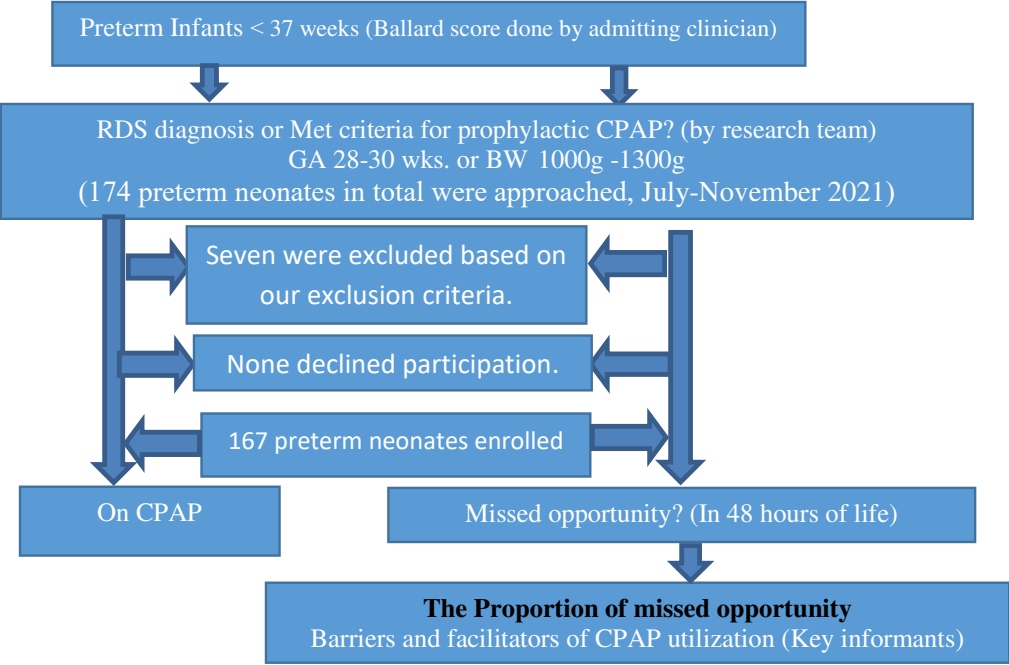

Figure S1. Study summary for quantitative study

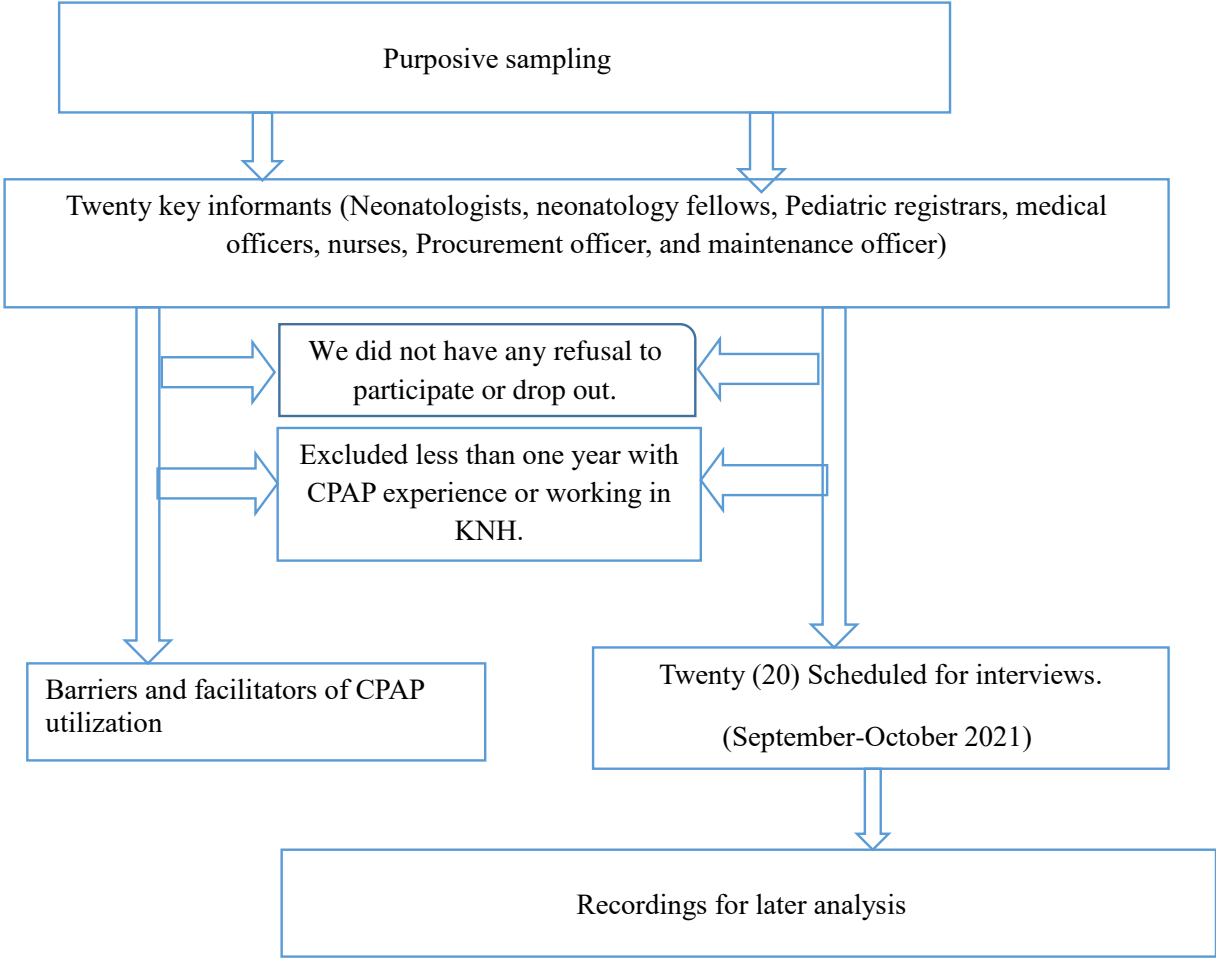

**Figure S2. Study summary for qualitative study.**

Table S1: SAS group (4-6) (exclusion of those in the prophylactic group).

|                    |     | Frequency<br>( <i>n</i> =91) | Percent | 95% CI        |
|--------------------|-----|------------------------------|---------|---------------|
| CPAP<br>management | Yes | 69                           | 75.8    | 66.1% - 83.5% |
|                    | No  | 22                           | 24.2    | 16.5% - 33.9% |
| Total              |     | 91                           | 100     |               |
